# Supplementary material for: Impact of Fetal Growth Restriction on the Neonatal Microglial Proteome in the Rat
Source: MDPI journal article supplement (doi:10.3390/nu13113719), 2021-10-22

|           |                                                            |                                            |                      |                     |               |
|-----------|------------------------------------------------------------|--------------------------------------------|----------------------|---------------------|---------------|
| Figure 1  | Variable                                                   | Number of well                             | Number of cells/well |                     |               |
| 1B        | % of cell stained / dapi                                   | 6                                          | 50-80                |                     |               |
|           |                                                            |                                            |                      |                     |               |
|           |                                                            | Student's t-test                           |                      | N=number of animals |               |
| Figure 2  | Variable                                                   | t-values                                   | p-values             | CTRL                | LPD           |
| 2A        | body weight                                                | E17 t <sub>25</sub> =5.437                 | p<0.0001             | 12                  | 15            |
|           |                                                            | P1 t <sub>52</sub> =18.35                  | p<0.0001             | 27                  | 27            |
|           |                                                            | P2 t <sub>20</sub> =11.64                  | p<0.0001             | 11                  | 11            |
|           |                                                            | P4 t <sub>20</sub> =9.02                   | p<0.0001             | 11                  | 11            |
|           |                                                            |                                            |                      |                     |               |
|           |                                                            | LPD vs CTRL P1                             |                      | LPD vs CTRL P4      |               |
| Figure 3A | Reactome pathway                                           | Nominal pValue                             | FDR                  | Nominal pValue      | FDR           |
|           | FCERI_MEDIATED_NF_KB_ACTIVATION                            | 0,000                                      | 0,000                | 0,000               | 0,052         |
|           | DECTIN_1_MEDIATED_NONCANONICAL_NF_KB_SIGNALING             | 0,000                                      | 0,000                | 0,000               | 0,145         |
|           | CELLULAR_RESPONSE_TO_HYPOXIA                               | 0,000                                      | 0,000                | 0,000               | 0,047         |
|           | REGULATION_OF_APOPTOSIS                                    | 0,000                                      | 0,000                | 0,000               | 0,1269        |
|           | CROSS_PRESENTATION_OF_SOLUBLE_EXOGENOUS_ANTIGENS_ENDOSOMES | 0,000                                      | 0,015                | 0,000               | 0,092         |
|           | INTERLEUKIN_1_SIGNALING                                    | 0,000                                      | 0,014                | 0,000               | 0,163         |
|           | TNFR2_NON_CANONICAL_NF_KB_PATHWAY                          | 0,000                                      | 0,038                | 0,000               | 0,1373        |
|           | INTERLEUKIN_17_SIGNALING                                   | 0,000                                      | 0,065                | 0,667               | 0,976         |
|           | ANTIGEN_PROCESSING_CROSS_PRESENTATION                      | 0,750                                      | 1,000                | 0,000               | 0,0643        |
|           | LYSOSOME_VESICLE_BIOGENESIS                                | 1,000                                      | 1,000                | 0,000               | 0,106         |
|           |                                                            |                                            |                      |                     |               |
|           |                                                            | 2 Way Anova                                |                      | N=number of animals |               |
| Figure 4  | Variable                                                   | F-values                                   | p-values             | CTRL                | LPD           |
| 4C        | ROS                                                        | Interaction:F <sub>(60, 320)</sub> = 3.808 | P<0.0001             | 5 HBSS, 5 PMA       | 5 HBSS, 5 PMA |
| 4D        | ROS AUC                                                    | Interaction: F <sub>(1, 16)</sub> =19.35   | P=0.0004             | 5 HBSS, 5 PMA       | 5 HBSS, 5 PMA |
|           |                                                            |                                            |                      |                     |               |
|           |                                                            | CTRL P4 vs CTRL P1                         |                      | LPD P4 vs LPD P1    |               |
| Figure 5E | Reactome pathway                                           | Nominal pValue                             | FDR                  | Nominal pValue      | FDR           |
|           | TNFR2_NON_CANONICAL_NF_KB_PATHWAY                          | 0,000                                      | 0,047                | 0,000               | 0,177         |
|           | FCERI_MEDIATED_NF_KB_ACTIVATION                            | 0,000                                      | 0,000                | 0,000               | 0,215         |
|           | INTERLEUKIN_1_SIGNALING                                    | 0,000                                      | 0,026                | 0,000               | 0,210         |
|           | DECTIN_1_MEDIATED_NONCANONICAL_NF_KB_SIGNALING             | 0,000                                      | 0,050                | 0,000               | 0,184         |
|           | ANTIGEN_PROCESSING_CROSS_PRESENTATION                      | 0,000                                      | 0,220                | 0,000               | 0,152         |
|           | REGULATION_OF_APOPTOSIS                                    | 0,000                                      | 0,055                | 0,182               | 0,900         |
|           | STABILIZATION_OF_P53                                       | 0,000                                      | 0,058                | 0,200               | 0,900         |
|           | G2_M_CHECKPOINTS                                           | 0,000                                      | 0,041                | 0,000               | 0,148         |
|           | MITOTIC_G1_G1_S_PHASES                                     | 0,000                                      | 0,127                | 0,000               | 0,159         |
|           | DNA_REPLICATION_PRE_INITIATION                             | 0,000                                      | 0,097                | 0,020               | 0,148         |
|           | G2_M_DNA_DAMAGE_CHECKPOINT                                 | 0,000                                      | 0,098                | 0,031               | 0,161         |
|           | NUCLEOTIDE_EXCISION_REPAIR                                 | 0,154                                      | 0,436                | 0,000               | 0,167         |
|           | DNA_REPAIR                                                 | 0,111                                      | 0,390                | 0,000               | 0,000         |
|           | DNA_DOUBLE_STRAND_BREAK_REPAIR                             | 0,000                                      | 0,031                | 0,000               | 0,191         |
|           | GLOBAL_GENOME_NUCLEOTIDE_EXCISION_REPAIR_GG_NER            | 0,133                                      | 0,373                | 0,000               | 0,157         |
|           | OXIDATIVE_STRESS_INDUCED_SENESCENCE                        | 0,785                                      | 0,885                | 0,000               | 0,109         |
|           | CELLULAR_SENESCENCE                                        | 0,923                                      | 0,943                | 0,000               | 0,168         |
|           | EPIGENETIC_REGULATION_OF_GENE_EXPRESSION                   | 1,000                                      | 1,000                | 0,037               | 0,229         |
|           |                                                            |                                            |                      |                     |               |
|           |                                                            | CTRL P4 vs CTRL P1                         |                      | LPD P4 vs LPD P1    |               |
| Figure 5F | Reactome pathway                                           | Nominal pValue                             | FDR                  | Nominal pValue      | FDR           |
|           | COPI_DEPENDENT_GOLGI_TO_ER_RETROGRADE_TRAFFIC              | 0,583                                      | 0,807                | 0,000               | 0,078         |
|           | GOLGI_TO_ER_RETROGRADE_TRANSPORT                           | 0,583                                      | 0,841                | 0,000               | 0,078         |
|           | INTRA_GOLGI_AND_RETROGRADE_GOLGI_TO_ER_TRAFFIC             | 0,417                                      | 0,813                | 0,000               | 0,230         |
|           | MITOCHONDRIAL_TRANSLATION                                  | 0,000                                      | 0,238                | 0,615               | 0,884         |

Supplementary Figure 1: Weekly food intake (A), protein intake (B) and body weight (C) in pregnant rats fed with normal (N=17) and low protein (N=20) diets.

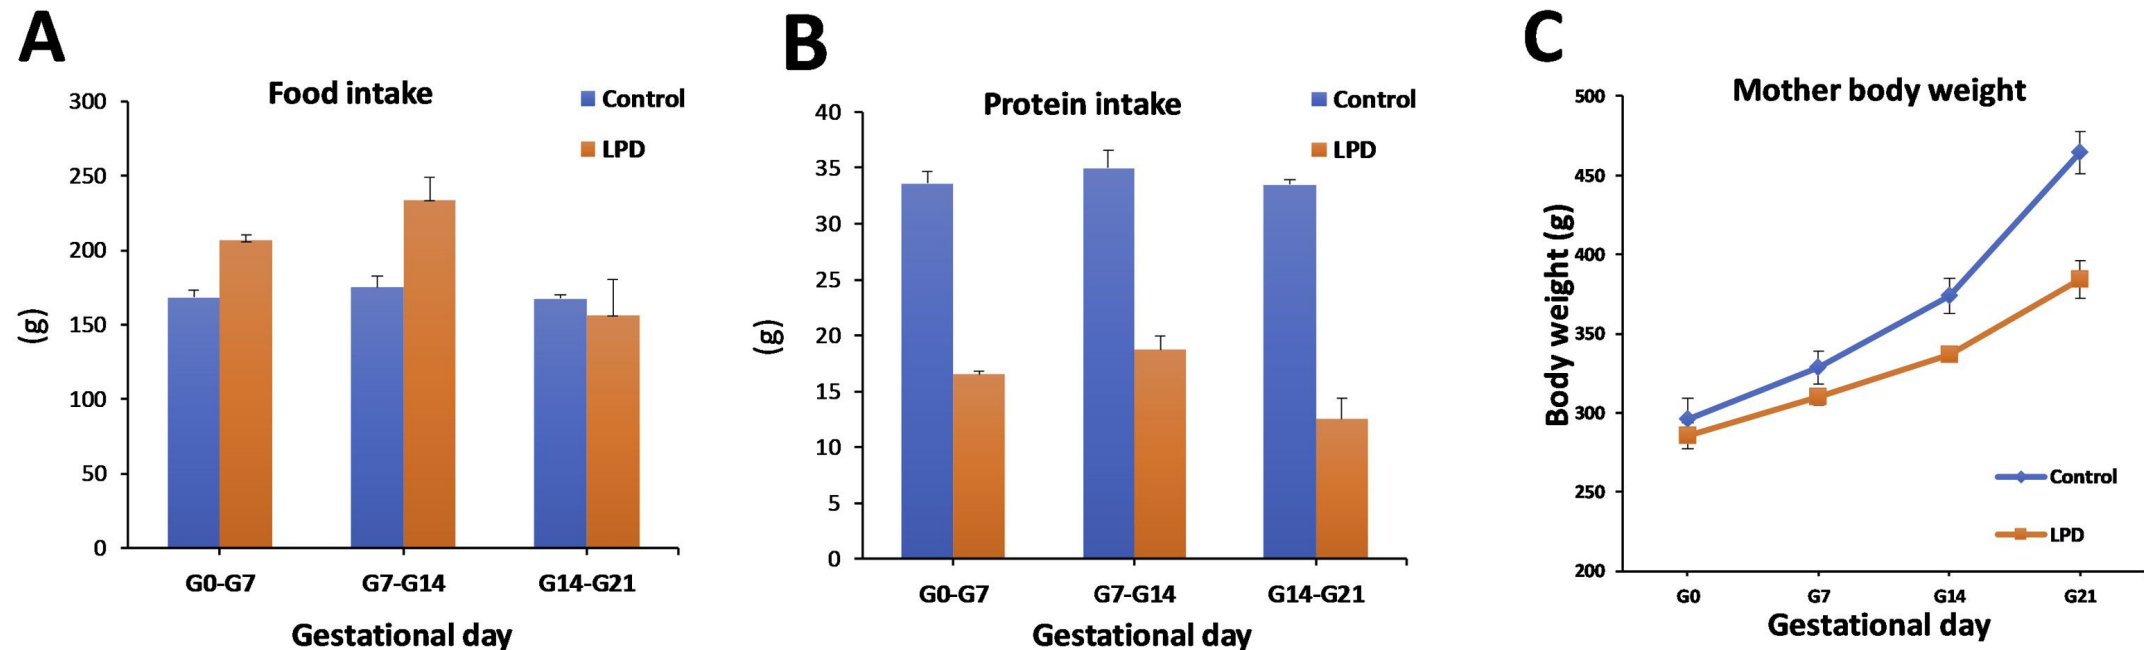

Supplement: s1 [file s1]
